# Supplementary material
Source: publisher figshare collection journal article supplement (https://gsajournals.figshare.com/ndownloader/files/28401858)
Supplement: Supplementary file 1 [file 28401858]

| Linkage Group | Interleaving Scaffolds | Max Distance (cM)1 | Scaffold2 |
| --- | --- | --- | --- |
| 1 | s719; s5841; s18236; s3927 | 33.19 | s18236 |
| 3 | s10495; s10613; s10634; s12141; s15450; s22322; s26009 | 6.09 | s15450 |
| 5 | s9349; s7806; s13072; s10851 | 9.21 | s13072 |

Table S2. Scaffolds in the genetic map with markers differing in order on the physical map.

1The maximum genetic distance between markers on the same scaffold2 separated by other scaffolds.
